# Supplementary material for: Influence of Genetic Variants in EGF and Other Genes on Hematological Traits in Korean Populations by a Genome-Wide Approach
Source: Hindawi journal article supplement (doi:10.1155/2015/914965), 2015-01-01
Supplement: f1 [file 914965.f1.pdf]

## Supplementary Information

### **Influence of genetic variants in EGF and other genes on hematological traits in Korean populations by a genome-wide approach**

Yun Kyoung Kim<sup>1\*</sup>, Ji Hee Oh<sup>1\*</sup>, Young Jin Kim<sup>1</sup>, Mi Yeong Hwang<sup>1</sup>, Sanghoon Moon<sup>1</sup>, Siew-Kee Low<sup>2</sup>, Atsushi Takahashi<sup>2</sup>, Koichi Matsuda<sup>3</sup>, Michiaki Kubo<sup>2</sup>, Juyoung Lee<sup>1</sup> and Bong-Jo Kim<sup>1§</sup>

*<sup>1</sup>Division of Structural and Functional Genomics, Center for Genome Science, National Institute of Health, Centers for Disease Control and Prevention, Chungcheongbuk-do, Korea, <sup>2</sup>Center for Integrative Medical Sciences, RIKEN, Kanagawa, Japan, <sup>3</sup>Institute of Medical Science, The University of Tokyo, Tokyo, Japan*

\*These authors contributed equally to this work.

§Corresponding author:

Bong-Jo Kim, Ph.D.

Division of Structural and Functional Genomics, Center for Genome Science, National Institute of Health, Centers for Disease Control and Prevention, Chungcheongbuk-do, Korea, 361-951, Phone : +82-43-719-8870, FAX : +82-43-719-8908, E-mail : kbj6181@cdc.go.kr

**Supplementary Figure 1** The quantile - quantile plots for five hematological traits in discovery stage showed genome-wide distribution of the empirically observed of test statistic in comparison with the expected null distribution. (a) is plots for Hb, (b) is for Hct, (c) is for RBC, (d) is for WBC and (e) is for PLT.

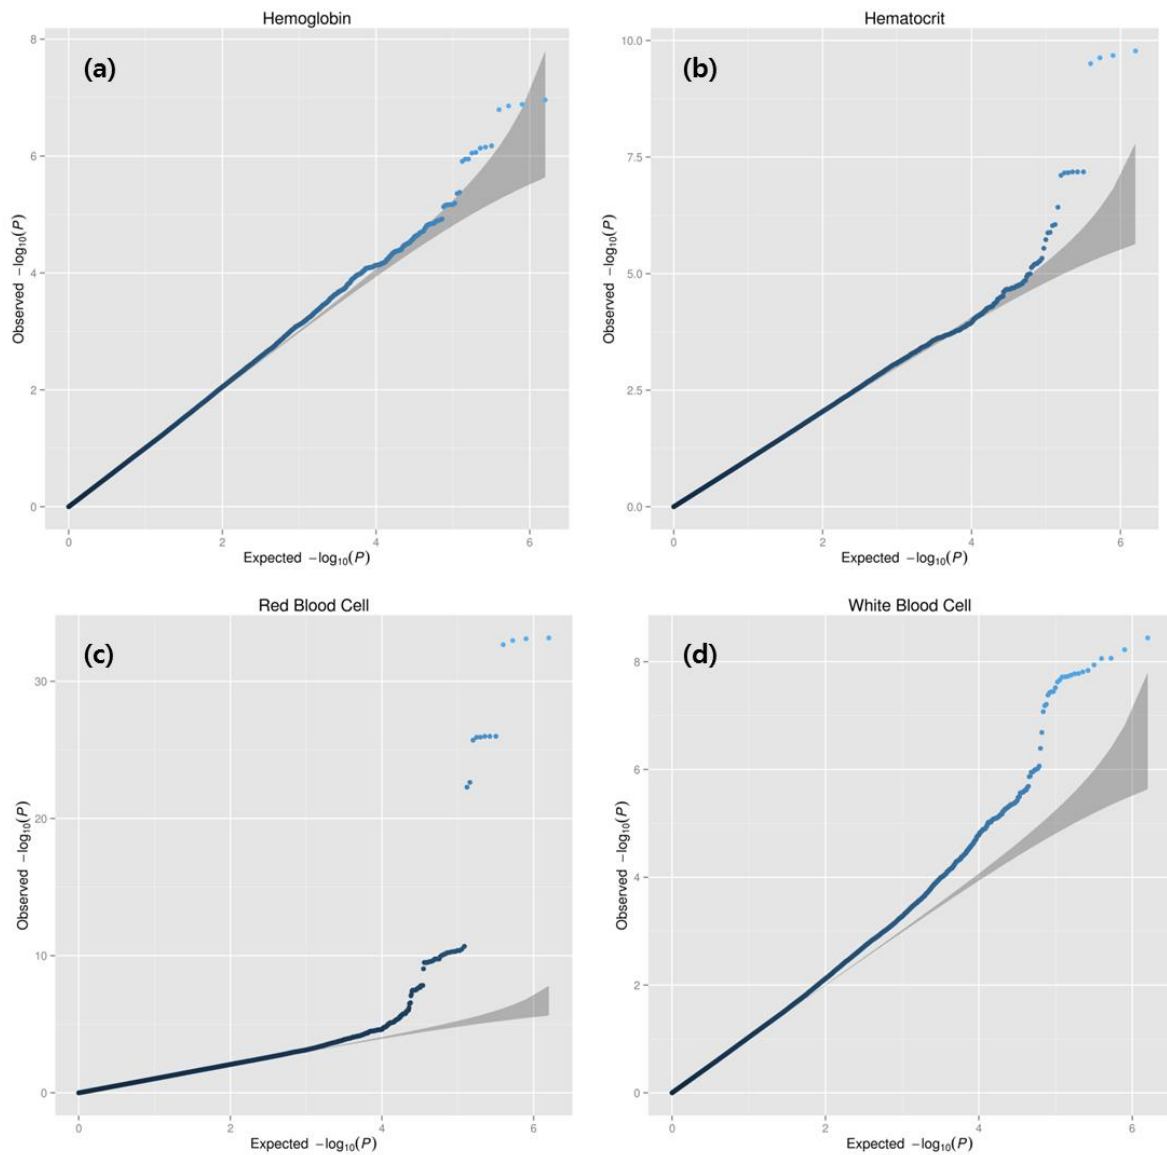

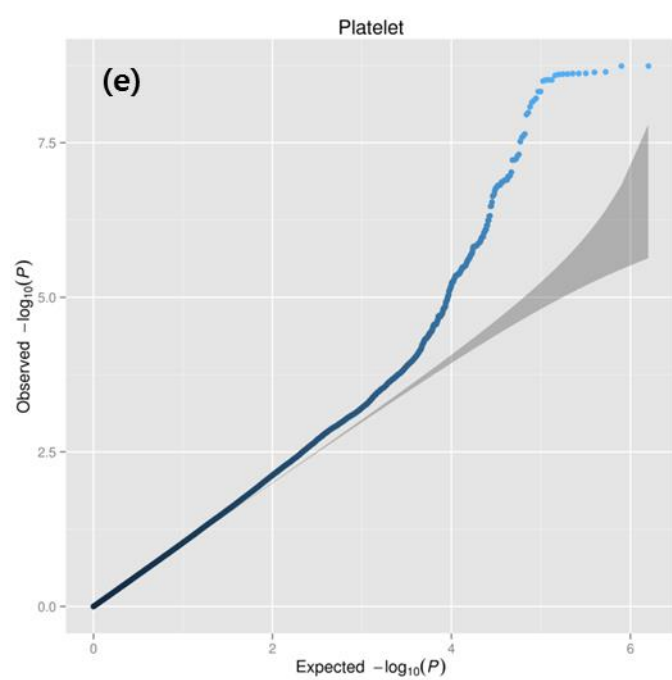

**Supplementary Figure 2** Population diversity of rs2282786 referring from Database of Single Nucleotide Polymorphism (dbSNP, <http://www.ncbi.nlm.nih.gov/snp/>)

| Sample Ascertainment                               |                     |                    |        | Genotype Detail |       |       |       | Alleles |       |
|----------------------------------------------------|---------------------|--------------------|--------|-----------------|-------|-------|-------|---------|-------|
| Population                                         | Individual Group    | Chrom. Sample Cnt. | Source | C/C             | C/T   | T/T   | HWP   | C       | T     |
| <a href="#">AFD_EUR_PANEL</a>                      | European            | 48                 | IG     |                 |       |       |       |         |       |
| <a href="#">AFD_AFR_PANEL</a>                      | African American    | 46                 | IG     |                 |       |       |       |         |       |
| <a href="#">AFD_CHN_PANEL</a>                      | Asian               | 46                 | IG     | 0.087           | 0.652 | 0.261 | 0.100 | 0.413   | 0.587 |
| <a href="#">HapMap-CEU</a>                         | European            | 120                | IG     |                 |       |       |       |         |       |
| <a href="#">HapMap-HCB</a>                         | Asian               | 90                 | IG     | 0.089           | 0.356 | 0.556 | 0.584 | 0.267   | 0.733 |
| <a href="#">HapMap-JPT</a>                         | Asian               | 86                 | IG     | 0.070           | 0.326 | 0.605 | 0.584 | 0.233   | 0.767 |
| <a href="#">HapMap-YRI</a>                         | Sub-Saharan African | 118                | IG     |                 |       |       |       |         |       |
| <a href="#">pilot_1_CHB+JPT_low_coverage_panel</a> |                     | 120                | AF     |                 |       |       |       | 0.258   | 0.742 |
| <a href="#">JBIC-allele</a>                        |                     | 728                | AF     |                 |       |       |       | 0.211   | 0.789 |

Supplementary Table 1. Descriptive statistics of samples analyzed in this study

|                                        |            | Discovery         |       | Replication 1      |       | Replication 2        |       | Replication 3               |       |
|----------------------------------------|------------|-------------------|-------|--------------------|-------|----------------------|-------|-----------------------------|-------|
| Traits                                 |            | KARE<br>(n=8,842) |       | CAVAS<br>(n=3,667) |       | Health2<br>(n=8,053) |       | BioBank Japan<br>(n=23,032) |       |
| Age                                    |            | 52.2 ± 8.92       |       | 59.8 ± 10.05       |       | 56.8 ± 7.85          |       | 63.5 ± 11.94                |       |
| Sex                                    | male (%)   | 4,183 (47.3%)     |       | 1,375 (37.5%)      |       | 3,281 (40.7%)        |       | 12,366 (53.7%)              |       |
|                                        | female (%) | 4,659 (52.7%)     |       | 2,292 (62.5%)      |       | 4,762 (59.1%)        |       | 10,666 (46.3%)              |       |
|                                        |            | mean ± SD         | CV(%) | mean ± SD          | CV(%) | mean ± SD            | CV(%) | mean ± SD                   | CV(%) |
| Hemoglobin (g/dL)                      |            | 13.6 ± 1.60       | 11.8  | 13.6 ± 1.43        | 10.5  | -                    | -     | -                           | -     |
| Hematocrit (%)                         |            | 41.0 ± 4.60       | 11.2  | 40.4 ± 4.15        | 10.3  | -                    | -     | -                           | -     |
| RBC (× 10 <sup>6</sup> /μL)            |            | 4.42 ± 0.49       | 11.1  | 4.34 ± 0.42        | 9.7   | -                    | -     | -                           | -     |
| WBC (× 10 <sup>3</sup> /μL)            |            | 6.59 ± 1.84       | 27.9  | 6.57 ± 1.87        | 28.5  | -                    | -     | -                           | -     |
| Platelet count (× 10 <sup>3</sup> /μL) |            | 266.3 ± 65.3      | 24.5  | 258.6 ± 62.0       | 24.0  | 258.0 ± 62.4         | 24.2  | 231.1 ± 90.9                | 39.3  |

n, sample size; RBC, red blood cell count; WBC, white blood cell count; CV, coefficient of variation;  
KARE, Korean Association Resource Project; CAVAS, Cardiovascular disease Association Study;  
Data are shown as mean ± standard deviation.

**Supplementary Table 2. Genomic inflation factors of analyses in the discovery stage**

| Trait | Inflation factor |
|-------|------------------|
| Hb    | 1.003623         |
| Hct   | 1.016721         |
| RBC   | 1.035321         |
| WBC   | 1.029904         |
| PLT   | 1.036225         |

Genomic inflation factor is defined as the ratio of the median of the observed distribution of the test statistic to the expected median.

**Supplementary Table 3. Association results of 32 variants that were verified in the replication stage.**

| Trait | CHR | SNP        | Cytoband | BP        | Gene            | A1/A2 | MAF  | Discovery<br>(KARE, n=8,842) |          | Replication<br>(CAVAS, n=3,667) |          | Combined<br>(n=12,509) |          |                            |
|-------|-----|------------|----------|-----------|-----------------|-------|------|------------------------------|----------|---------------------------------|----------|------------------------|----------|----------------------------|
|       |     |            |          |           |                 |       |      | effect size                  | <i>P</i> | effect size                     | <i>P</i> | effect size            | <i>P</i> | <i>P<sub>het</sub></i> (Q) |
| Hb    | 22  | rs2076086  | 22q12.3  | 35800482  | TMPRSS6         | T/C   | 0.49 | 0.09 ± 0.02                  | 7.33E-07 | 0.11 ± 0.03                     | 3.24E-05 | 0.09 ± 0.01            | 1.19E-10 | 0.52(0.41)                 |
|       | 2   | rs2218660  | 2p21     | 46201296  | PRKCE           | G/T   | 0.18 | -0.09 ± 0.02                 | 6.51E-05 | -0.09 ± 0.03                    | 6.04E-03 | -0.09 ± 0.02           | 1.25E-06 | 0.95(0.00)                 |
|       | 6   | rs2523554  | 6p21.33  | 31439808  | HLA-B-MICA      | C/T   | 0.12 | 0.11 ± 0.03                  | 9.34E-05 | 0.10 ± 0.04                     | 1.44E-02 | 0.11 ± 0.02            | 4.06E-06 | 0.87(0.03)                 |
| Hct   | 6   | rs9376090  | 6q23.3   | 135452921 | HBS1L-MYB       | C/T   | 0.32 | -0.35 ± 0.05                 | 1.68E-10 | -0.18 ± 0.08                    | 2.68E-02 | -0.30 ± 0.05           | 6.20E-11 | 0.08(3.05)                 |
|       | 2   | rs2218660  | 2p21     | 46201296  | PRKCE           | G/T   | 0.18 | -0.30 ± 0.07                 | 4.69E-06 | -0.27 ± 0.10                    | 5.84E-03 | -0.29 ± 0.05           | 9.22E-08 | 0.81(0.06)                 |
| RBC   | 6   | rs7775698  | 6q23.3   | 135460328 | HBS1L-MYB       | T/C   | 0.33 | -0.07 ± 0.01                 | 6.82E-34 | -0.06 ± 0.01                    | 4.92E-12 | -0.07 ± 0.01           | 2.69E-44 | 0.20(1.68)                 |
|       | 4   | rs17084406 | 4q12     | 55056941  | PDGFRA-KIT      | G/A   | 0.26 | -0.04 ± 0.01                 | 2.09E-11 | -0.05 ± 0.01                    | 1.81E-08 | -0.05 ± 0.01           | 2.85E-18 | 0.36(0.85)                 |
|       | 6   | rs3218108  | 6p21.1   | 42010633  | CCND3           | T/C   | 0.22 | 0.04 ± 0.01                  | 2.15E-10 | 0.05 ± 0.01                     | 2.54E-06 | 0.04 ± 0.01            | 2.59E-15 | 0.79(0.07)                 |
|       | 12  | rs7138216  | 12p13.32 | 4204569   | PARP11-CCND2    | C/G   | 0.27 | -0.03 ± 0.01                 | 2.70E-07 | -0.03 ± 0.01                    | 4.73E-03 | -0.03 ± 0.01           | 5.19E-09 | 0.54(0.37)                 |
|       | 9   | rs8176743  | 9q34.2   | 135121236 | ABO             | T/C   | 0.21 | 0.03 ± 0.01                  | 9.88E-07 | 0.03 ± 0.01                     | 5.73E-03 | 0.03 ± 0.01            | 2.12E-08 | 0.62(0.25)                 |
|       | 2   | rs2218660  | 2p21     | 46201296  | PRKCE           | G/T   | 0.18 | -0.03 ± 0.01                 | 2.90E-06 | -0.03 ± 0.01                    | 2.90E-03 | -0.03 ± 0.01           | 2.94E-08 | 0.85(0.04)                 |
|       | 6   | rs11153167 | 6q21     | 109729275 | CCDC162P        | T/A   | 0.11 | -0.04 ± 0.01                 | 5.10E-05 | -0.03 ± 0.01                    | 3.72E-02 | -0.03 ± 0.01           | 6.12E-06 | 0.57(0.33)                 |
|       | 8   | rs16887645 | 8q23.3   | 116767229 | TRPS1-LINC00536 | A/C   | 0.08 | -0.04 ± 0.01                 | 7.00E-05 | -0.04 ± 0.02                    | 2.13E-02 | -0.04 ± 0.01           | 4.49E-06 | 0.75(0.10)                 |
| WBC   | 16  | rs11859733 | 16q21    | 56889274  | PRSS54-GINS3    | C/T   | 0.26 | -0.03 ± 0.01                 | 8.56E-05 | -0.03 ± 0.01                    | 3.62E-03 | -0.03 ± 0.01           | 1.01E-06 | 0.96(0.00)                 |
|       | 17  | rs8070454  | 17q21.1  | 35414280  | PSMD3-CSF3      | T/C   | 0.47 | 0.16 ± 0.03                  | 3.62E-09 | 0.11 ± 0.04                     | 8.68E-03 | 0.15 ± 0.02            | 1.74E-10 | 0.31(1.04)                 |
|       | 3   | rs10936603 | 3q26.2   | 171028346 | LRRIQ4          | G/T   | 0.32 | -0.14 ± 0.03                 | 4.42E-06 | -0.09 ± 0.05                    | 4.36E-02 | -0.12 ± 0.02           | 7.40E-07 | 0.41(0.68)                 |
|       | 7   | rs11981340 | 7q21.2   | 92153596  | CDK6            | C/T   | 0.34 | -0.13 ± 0.03                 | 4.99E-06 | -0.20 ± 0.04                    | 9.58E-06 | -0.15 ± 0.02           | 4.33E-10 | 0.21(1.58)                 |
|       | 2   | rs3729569  | 2q21.3   | 136319775 | MCM6            | T/G   | 0.18 | 0.15 ± 0.04                  | 6.87E-05 | 0.16 ± 0.06                     | 3.59E-03 | 0.15 ± 0.03            | 8.33E-07 | 0.79(0.07)                 |
| PLT   | 4   | rs9760319  | 4q28.3   | 138631979 | NONE-PCDH18     | G/A   | 0.43 | 0.11 ± 0.03                  | 9.17E-05 | 0.09 ± 0.04                     | 3.94E-02 | 0.10 ± 0.02            | 1.04E-05 | 0.73(0.12)                 |
|       | 4   | rs2282786  | 4q25     | 111141945 | EGF             | C/T   | 0.25 | -6.66 ± 1.12                 | 3.18E-09 | -6.58 ± 1.74                    | 1.58E-04 | -6.64 ± 0.94           | 2.05E-12 | 0.97(0.00)                 |
|       | 22  | rs1977081  | 22q13.31 | 42661461  | PNPLA3          | C/T   | 0.41 | -5.84 ± 1.00                 | 4.70E-09 | -3.76 ± 1.61                    | 1.94E-02 | -5.27 ± 0.85           | 5.10E-10 | 0.27(1.21)                 |
|       | 12  | rs739496   | 12q24.12 | 110372042 | SH2B3           | A/G   | 0.11 | -8.36 ± 1.57                 | 1.06E-07 | -5.75 ± 2.39                    | 1.60E-02 | -7.57 ± 1.31           | 8.00E-09 | 0.36(0.84)                 |

|    |            |          |           |                    |     |      |              |          |              |          |              |          |            |
|----|------------|----------|-----------|--------------------|-----|------|--------------|----------|--------------|----------|--------------|----------|------------|
| 6  | rs9277053  | 6p21.32  | 33114200  | HLA-DOA-HLA-DPA1   | A/G | 0.34 | 5.18 ± 1.05  | 7.95E-07 | 5.27 ± 1.62  | 1.18E-03 | 5.21 ± 0.88  | 3.43E-09 | 0.96(0.00) |
| 6  | rs9399137  | 6q23.3   | 135460711 | HBS1L-MYB          | C/T | 0.33 | 5.24 ± 1.07  | 1.06E-06 | 5.00 ± 1.63  | 2.20E-03 | 5.17 ± 0.90  | 8.07E-09 | 0.90(0.02) |
| 3  | rs13091574 | 3q27.1   | 185574799 | THPO               | C/A | 0.16 | 6.39 ± 1.32  | 1.28E-06 | 6.22 ± 2.14  | 3.73E-03 | 6.34 ± 1.12  | 1.62E-08 | 0.94(0.01) |
| 6  | rs9469032  | 6p21.33  | 31753405  | LY6G5C             | G/C | 0.03 | 12.7 ± 2.76  | 4.42E-06 | 16.6 ± 4.34  | 1.35E-04 | 13.8 ± 2.33  | 3.12E-09 | 0.45(0.58) |
| 6  | rs5745582  | 6p21.31  | 33654476  | BAK1               | T/C | 0.22 | 5.03 ± 1.16  | 1.52E-05 | 5.39 ± 1.81  | 2.88E-03 | 5.14 ± 0.98  | 1.48E-07 | 0.87(0.03) |
| 11 | rs7946919  | 11q23.3  | 118646042 | CBL                | G/A | 0.44 | 4.42 ± 1.03  | 1.83E-05 | 4.84 ± 1.56  | 1.92E-03 | 4.55 ± 0.86  | 1.23E-07 | 0.82(0.05) |
| 13 | rs4519241  | 13q31.1  | 84301372  | MIR548F1-SLITRK6   | C/A | 0.40 | -4.18 ± 1.01 | 3.26E-05 | -3.82 ± 1.60 | 1.70E-02 | -4.08 ± 0.85 | 1.67E-06 | 0.85(0.04) |
| 22 | rs2266950  | 22q11.21 | 19566372  | SNAP29             | A/G | 0.05 | 9.57 ± 2.32  | 3.61E-05 | 7.14 ± 3.60  | 4.71E-02 | 8.86 ± 1.95  | 5.36E-06 | 0.57(0.32) |
| 7  | rs10260466 | 7p12.1   | 53688906  | POM121L12-FLJ45974 | A/C | 0.22 | -4.69 ± 1.18 | 7.11E-05 | -4.36 ± 1.83 | 1.71E-02 | -4.59 ± 0.99 | 3.60E-06 | 0.88(0.02) |
| 17 | rs6065     | 17p13.2  | 4777161   | GP1BA              | T/C | 0.09 | 6.81 ± 1.74  | 8.82E-05 | 8.89 ± 2.58  | 5.78E-04 | 7.46 ± 1.44  | 2.25E-07 | 0.50(0.45) |

A1 is defined as minor allele and A2 is major allele.

**Supplementary Table 4. Replication of previously reported loci associated with hematological traits in Korean populations (SNP ID perfectly matched).**

| Trait | SNP        | CHR | BP        | Gene                   | A1/A2 | Previously implicated |                   |                        |           | Replicated<br>in Korean population<br>(n=8,842) |          |
|-------|------------|-----|-----------|------------------------|-------|-----------------------|-------------------|------------------------|-----------|-------------------------------------------------|----------|
|       |            |     |           |                        |       | MAF                   | effect size       | <i>P</i>               | Reference | effect size                                     | <i>P</i> |
| Hb    | rs10495928 | 2   | 46206670  | PRKCE                  | G/A   | 0.34                  | $0.06 \pm 0.009$  | $7.05 \times 10^{-13}$ | [1]       | $-0.07 \pm 0.023$                               | 1.17E-03 |
|       | rs495828   | 9   | 135144688 | ABO                    | T/G   | 0.28                  | $-0.09 \pm 0.013$ | $1.18 \times 10^{-11}$ | [2]       | $-0.08 \pm 0.020$                               | 2.26E-05 |
|       | rs6013509  | 20  | 50751758  | TSHZ2                  | A/G   | 0.18                  | $-0.06 \pm 0.010$ | $1.05 \times 10^{-10}$ | [1]       | $-0.02 \pm 0.019$                               | 0.2118   |
|       | rs5756504  | 22  | 35797216  | TMPRSS6                | T/C   | 0.45                  | $0.08 \pm 0.012$  | $1.64 \times 10^{-10}$ | [2]       | $0.09 \pm 0.017$                                | 8.65E-07 |
| Hct   | rs10168349 | 2   | 46208555  | PRKCE                  | C/G   | 0.34                  | $0.19 \pm 0.024$  | $3.75 \times 10^{-15}$ | [1]       | $-0.26 \pm 0.065$                               | 6.26E-05 |
|       | rs7775698  | 6   | 135460328 | HBS1L-MYB              | T/C   | 0.35                  | $-0.08 \pm 0.012$ | $9.52 \times 10^{-11}$ | [2]       | $-0.35 \pm 0.055$                               | 2.10E-10 |
|       | rs7385804  | 7   | 100073906 | TFR2                   | C/A   | 0.38                  | $-0.15 \pm 0.024$ | $4.45 \times 10^{-10}$ | [1]       | $0.06 \pm 0.086$                                | 0.5114   |
|       | rs495828   | 9   | 135144688 | ABO                    | T/G   | 0.28                  | $-0.08 \pm 0.013$ | $6.06 \times 10^{-10}$ | [2]       | $-0.22 \pm 0.057$                               | 9.26E-05 |
|       | rs2413450  | 22  | 35800170  | TMPRSS6                | T/C   | 0.38                  | $-0.17 \pm 0.024$ | $1.85 \times 10^{-13}$ | [1]       | $0.19 \pm 0.050$                                | 1.42E-04 |
| RBC   | rs10495928 | 2   | 46206670  | PRKCE                  | G/A   | 0.17                  | $-0.09 \pm 0.016$ | $3.81 \times 10^{-08}$ | [2]       | $-0.03 \pm 0.007$                               | 1.11E-04 |
|       | rs3218097  | 6   | 42013253  | USP49-MED20-BYSL-CCND3 | T/C   | 0.19                  | $0.10 \pm 0.015$  | $1.09 \times 10^{-10}$ | [2]       | $0.04 \pm 0.007$                                | 2.69E-10 |
|       | rs11966072 | 6   | 109741521 | C6orf182-CD164         | G/A   | 0.10                  | $-0.11 \pm 0.020$ | $6.92 \times 10^{-09}$ | [2]       | $-0.03 \pm 0.009$                               | 1.98E-04 |
|       | rs7775698  | 6   | 135460328 | HBS1L-MYB              | T/C   | 0.35                  | $-0.18 \pm 0.012$ | $7.31 \times 10^{-48}$ | [2]       | $-0.07 \pm 0.006$                               | 6.82E-34 |
|       | rs495828   | 9   | 135144688 | ABO                    | T/G   | 0.28                  | $-0.09 \pm 0.013$ | $3.33 \times 10^{-12}$ | [2]       | $-0.03 \pm 0.006$                               | 1.21E-06 |
|       | rs11611647 | 12  | 4204180   | CCND2                  | C/T   | 0.37                  | $-0.07 \pm 0.012$ | $6.44 \times 10^{-09}$ | [2]       | $-0.03 \pm 0.006$                               | 3.15E-07 |
| WBC   | rs3094212  | 6   | 31193749  | CDSN-PSORS1C1          | C/T   | 0.35                  | $0.07 \pm 0.012$  | $6.76 \times 10^{-09}$ | [2]       | $0.07 \pm 0.029$                                | 1.25E-02 |
|       | rs4895441  | 6   | 135468266 | HBS1L-MYB              | G/A   | 0.37                  | $-0.07 \pm 0.012$ | $1.67 \times 10^{-09}$ | [2]       | $-0.12 \pm 0.029$                               | 1.26E-05 |
|       | rs4065321  | 17  | 35397074  | GSDMA-PSMD3-CSF3-MED24 | T/C   | 0.32                  | $-0.09 \pm 0.012$ | $2.94 \times 10^{-14}$ | [2]       | $-0.16 \pm 0.028$                               | 1.45E-08 |
| PLT   | rs5745568  | 6   | 33656372  | BAK1                   | T/G   | 0.23                  | $0.09 \pm 0.014$  | $6.66 \times 10^{-11}$ | [2]       | $5.00 \pm 1.163$                                | 1.72E-05 |
|       | rs7775698  | 6   | 135460328 | HBS1L-MYB              | T/C   | 0.34                  | $0.09 \pm 0.012$  | $2.54 \times 10^{-14}$ | [2]       | $5.28 \pm 1.071$                                | 8.49E-07 |

|          |    |           |       |     |      |               |                        |     |               |          |
|----------|----|-----------|-------|-----|------|---------------|------------------------|-----|---------------|----------|
| rs739496 | 12 | 110372042 | SH2B3 | A/G | 0.16 | -0.14 ± 0.016 | $4.75 \times 10^{-19}$ | [2] | -8.36 ± 1.572 | 1.06E-07 |
|----------|----|-----------|-------|-----|------|---------------|------------------------|-----|---------------|----------|

A1 is defined as minor allele and A2 is major allele. [1], Ganesh *et al.* 2009; [2], Kamatani *et al.* 2010;
